# Supplementary material
Source: PubMed Central journal article supplement (PMC3155810)
Supplement: NIHMS307541-supplement-01.pdf [file NIHMS307541-supplement-01.pdf]

## Anisotropic material synthesis by capillary flow in a fluid stripe SUPPLEMENTARY INFORMATION

Matthew J. Hancock<sup>a,b,1</sup>, Francesco Piraino<sup>a,b,c,1</sup>, Gulden Camci-Unal<sup>a,b,1</sup>, Marco Rasponi<sup>c</sup>, Ali Khademhosseini<sup>a,b,d\*</sup>

<sup>a</sup> Center for Biomedical Engineering, Department of Medicine, Brigham and Women's Hospital, Harvard Medical School, Cambridge, MA, 02139, USA

<sup>b</sup> Harvard-MIT Division of Health Sciences and Technology, Massachusetts Institute of Technology, Cambridge, MA, 02139, USA

<sup>c</sup> Bioengineering Department, Politecnico di Milano, Piazza Leonardo da Vinci 32, 20133 Milan, Italy

<sup>d</sup> Wyss Institute for Biologically Inspired Engineering, Harvard University, Boston, MA 02115

<sup>1</sup>These authors contributed equally to this work

\*To whom correspondence should be addressed. Mailing address: Partners Research Building, Room 252, 65 Landsdowne Street, Cambridge, MA 02139 (USA); Email: alik@rics.bwh.harvard.edu; Fax: 617-768-8477

### Supplementary Figures

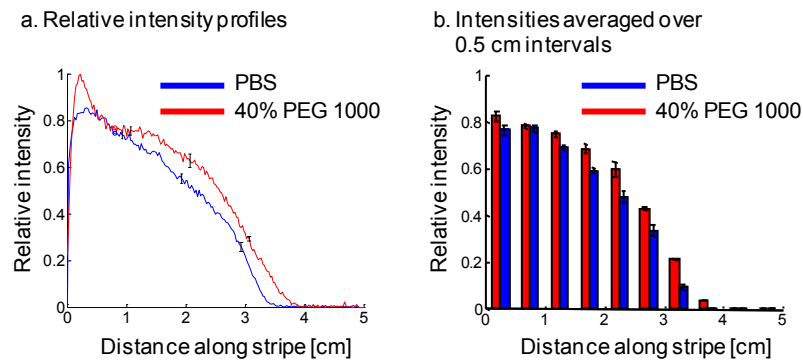

**Figure S1.** Schematic of averaging relative intensity values over 0.5 cm intervals for later significance testing. (a) Relative intensity profiles along stripe. (b) Discretized profiles obtained by averaging relative intensity profiles in each 0.5 cm interval along stripe.

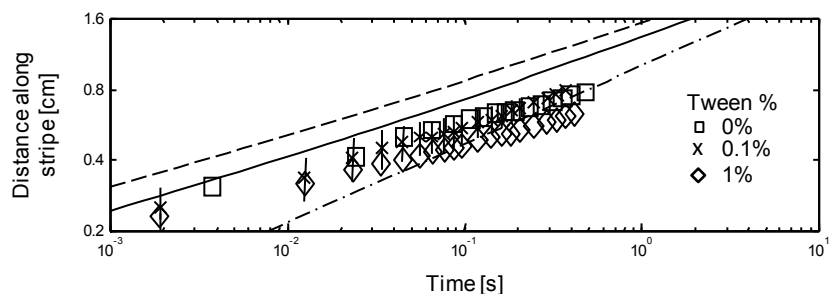

**Figure S2.** Effect of surface tension on flow speed. Measured flow speeds following droplet addition onto fluid stripe are plotted in dimensionless coordinates and compared to a previously developed theoretical model.<sup>[1]</sup> Droplet and pre-wet stripe consist of 20% PEGDM 1000 and the same concentration of the surfactant Tween-20. Standard deviation over three repetitions is less than symbol size except where noted by error bars. Curves (dashed, solid, dash-dot) are the same as those in Figure 2b of the main text, and correspond to a previously derived mathematical model.<sup>[1]</sup>

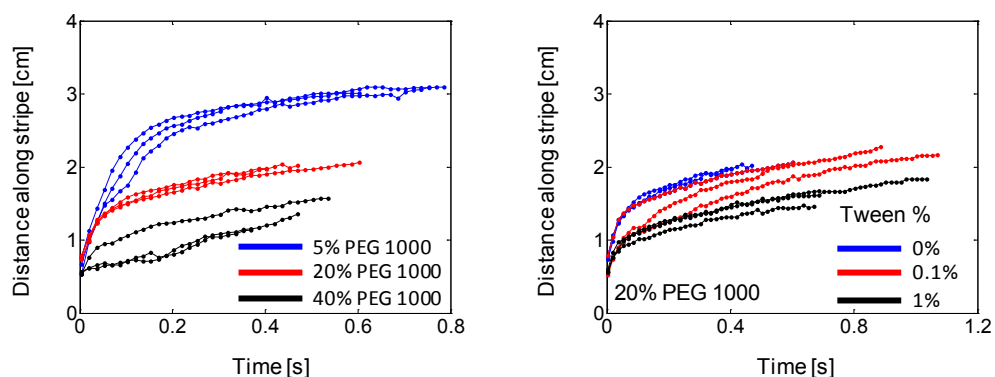

**Figure S3.** Raw tip position measurements in time during gradient generation, for (a) different concentrations of PEGDM 1000 and (b) 20% PEGDM 1000 with different concentrations of the surfactant Tween-20. Speed decreases with PEG and Tween concentration. Each point is the position of the tip in one frame captured from video. The three lines of each color in (a,b) are replicates of each case. The data in (a,b) corresponds to the scaled averaged positions plotted in Fig. 2a and S2.

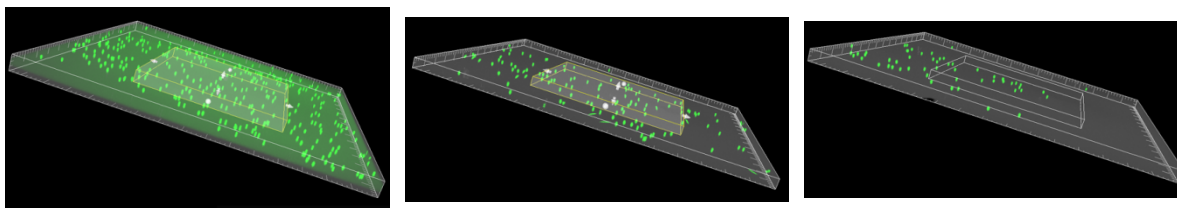

**Figure S4.** Definition of central regions for confocal images in drop, middle, and tip region, from left to right.

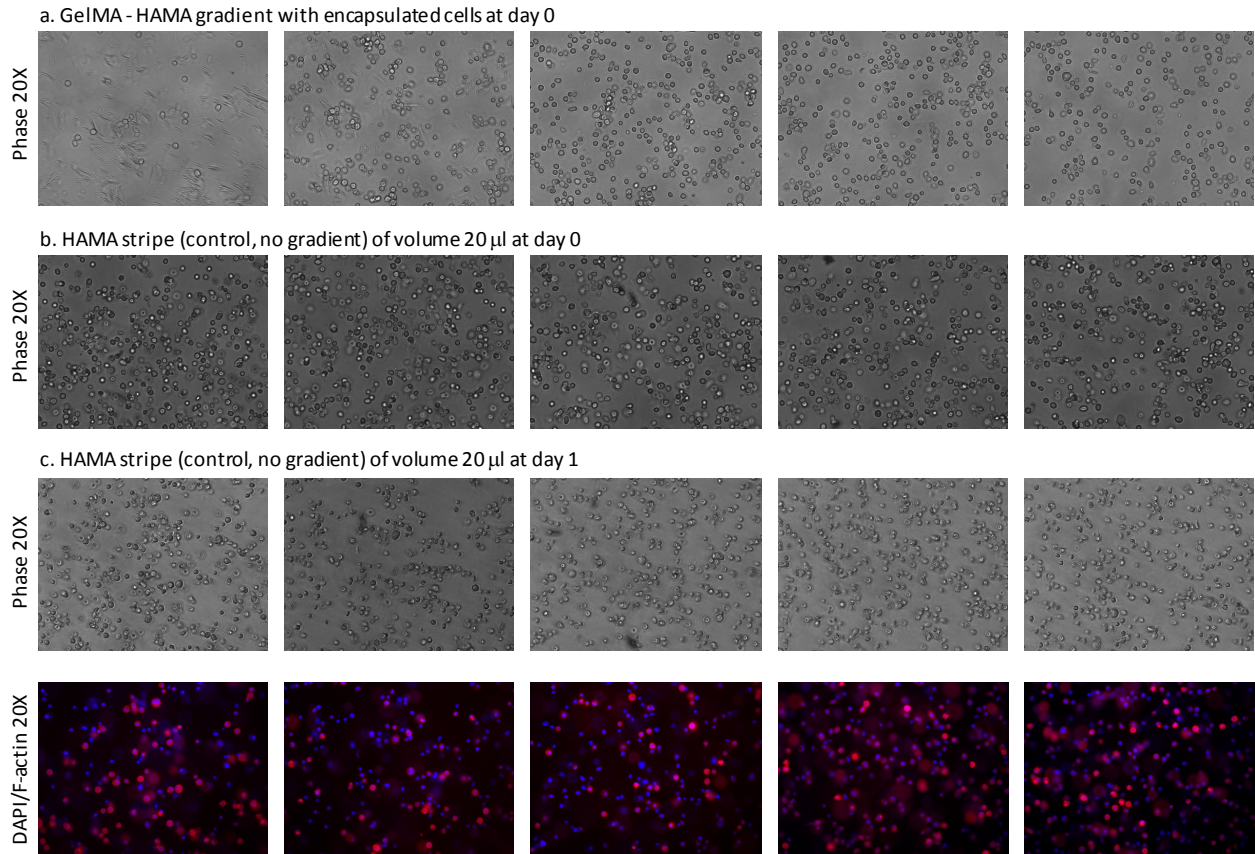

**Figure S5.** Spreading and concentration on gradients for cells encapsulated in gradient and control hydrogel stripes. Images in each row above were taken near the 0.5, 1.5, 2.5, 3.5, and 4.5 cm locations along the stripe. (a) 20X phase images of encapsulated cells in GelMA-HAMA gradient hydrogel. Cell counts from these images and repetitions were used to create the bar chart in Fig. 5a of main text. (b) 20X phase images of cells on stripe of HAMA at day 0. Cell counts from these images and repetitions used for bar chart in Fig. 5b of main text. (c) Encapsulated cells after 1 day of culture. Both phase and fluorescence images shown. No spreading is observed. Additional caption details may be found in Figure 5 of the main text. All images have the same scale; scale bar = 100  $\mu\text{m}$ .

**Table S1.** Viscosities of various aqueous polymer solutions found in the literature. For PEG 1000, 2000, 4000, values listed are for PEG dissolved in water (i.e. no salt). We used PEG dissolved in 1X PBS, which had approximately 1% salt content. In the literature, viscosity measurements at this relatively low salt content are approximately the same as those in water,<sup>[2]</sup> much like the similarity between the viscosities of PBS and water. Values can vary in the literature. For example, ref<sup>[3]</sup> lists the viscosity of 30% PEG 1000 in water at 298 K as 9.2 cSt, while ref<sup>[4]</sup> lists the viscosity of 29.5% PEG 1000 at 293 K as 6.3 cSt, which should be higher than the viscosity at 298 K since viscosity decreases with temperature. General fitting formulas have been provided for the viscosity of PEG over different MWs and temperatures.<sup>[4]</sup> The viscosity of HA varies with shear rate.<sup>[5]</sup> For 1% HA samples whose average MW is ~50 kDa, the viscosity is approximately constant below the critical shear rate of 164 s<sup>-1</sup>.<sup>[5]</sup> Based on the data for Fig. 2b in the main text, the flow rates measured on our fluid stripes for higher viscosity solutions such as 40% PEG 1000 were initially of order 10 cm s<sup>-1</sup> and decreased to less than 3 cm s<sup>-1</sup> after approximately 100 ms. Our 15 to 24  $\mu$ l pre-wet stripes were approximately 200 to 400  $\mu$ m deep.<sup>[1]</sup> Thus, the shear rates ranged from 250 to 500 s<sup>-1</sup> for the initial speed of 10 cm s<sup>-1</sup> and decreased to less than 150 s<sup>-1</sup> after approximately 100 ms (when speeds decreased to less than 3 cm s<sup>-1</sup>). Thus, during the first 100 ms of the flow, the viscosity of HA could have been reduced from its value listed above, but after approximately 100 ms, the shear rates should have been below the critical shear rate.

| Aqueous solutions             | Viscosity [cm <sup>2</sup> s <sup>-1</sup> ] at 298 K | Viscosity [cSt] at 298 K | Comment/Reference                                                          |
|-------------------------------|-------------------------------------------------------|--------------------------|----------------------------------------------------------------------------|
| Water                         | 0.008927                                              | 0.8927                   | Table 14 ref <sup>[6]</sup>                                                |
| PBS                           | 0.008997                                              | 0.8997                   | Interp. from Tables 14 & 15 in ref <sup>[6]</sup>                          |
| PEG 1000                      |                                                       |                          |                                                                            |
| 5%                            | 0.0122                                                | 1.22                     | Interp. from table 1, ref <sup>[7]</sup>                                   |
| 10%                           | 0.0165                                                | 1.65                     | Interp. from table 1, ref <sup>[7]</sup>                                   |
| 20%                           | 0.034 [293 K]                                         | 3.4 [293 K]              | Table 1 ref <sup>[8]</sup> and Table 2 ref <sup>[4]</sup>                  |
| 30%                           | 0.092                                                 | 9.2                      | Table 2, ref <sup>[3]</sup>                                                |
| 40%                           | 0.132                                                 | 13.2                     | Table 2, ref <sup>[3]</sup>                                                |
| 40% PEG 2000                  | 0.19378                                               | 19.378                   | Table 1, ref <sup>[9]</sup>                                                |
| PEG 4000                      |                                                       |                          |                                                                            |
| 5%                            | 0.0169                                                | 1.69                     | Interp. from table 1, ref <sup>[7]</sup>                                   |
| 10%                           | 0.0659                                                | 6.59                     | Interp. from table 2, ref <sup>[3]</sup>                                   |
| 20%                           | 0.111                                                 | 11.1                     | Interp. from table 2, ref <sup>[3]</sup>                                   |
| 30%                           | 0.222                                                 | 22.2                     | Interp. from table 2, ref <sup>[3]</sup>                                   |
| 40%                           | 0.469                                                 | 46.9                     | Interp. from table 2, ref <sup>[3]</sup>                                   |
| 1% HA (avg. MW 50 kDa)        | 0.5                                                   | 50                       | H-4 series in Figure 4, ref <sup>[5]</sup><br>(CM=5000 g/mL for MW ~50kDa) |
| 1% Heparin (avg. MW 15.6 kDa) | 1.5*0.0089<br>=0.0134                                 | 1.34                     | Figure 2 in ref <sup>[10]</sup>                                            |
| 2% Heparin (avg. MW 15.6 kDa) | 2*0.0089<br>= 0.0178                                  | 1.78                     | Extrapolation from Fig 2 in ref <sup>[10]</sup>                            |
| 2% Gelatin                    | 0.0251 [303 K]                                        | 2.51 [303 K]             | Figure 1 ref <sup>[11]</sup>                                               |
| 5% Gelatin                    | 0.09<br>0.05 [303 K]                                  | 9<br>5 [303 K]           | Figure 3 ref <sup>[12]</sup>                                               |

**Table S2.** Surface tensions of various aqueous solutions. Values gathered from literature. Surface tension in 1% (w/v) sodium chloride solutions approximately that of distilled water.<sup>[13]</sup>

| Solution                               | Surface tension [dynes/cm] at 298 K | Comment/Reference                                |
|----------------------------------------|-------------------------------------|--------------------------------------------------|
| Distilled water                        | 72                                  | “Properties of water” from ref <sup>[14]</sup>   |
| Tween-20 above CMC (0.04 mM), in water | 33 [295K]                           | Fig. 3 of ref <sup>[15]</sup>                    |
| PEG 1000                               |                                     |                                                  |
| 5%                                     | 65.8                                | Interpolated from Fig. 1A of ref <sup>[16]</sup> |
| 20%                                    | 64.6                                | Interpolated from Fig. 1A of ref <sup>[16]</sup> |
| 40%                                    | 64.0                                | Interpolated from Fig. 1A of ref <sup>[16]</sup> |

**Table S3.** Significance testing for Figure 3(a-i). For each gradient profile in Figure 3(a-i), the corresponding relative intensities of the three repeated trials were averaged over 0.5 cm intervals to produce data series consisting of 10 intensity values (Fig. S1). Balanced two-way ANOVA testing in Matlab produced p-values for each pair of data series, listed below. Lines highlighted in gray indicate p-values **above** 0.05.

| Case                      | p-value  | Case                      | p-value  |
|---------------------------|----------|---------------------------|----------|
| Concentration - PEG 1000  |          | Concentration - PEG 4000  |          |
| 40% - 20%                 | 0.000277 | 40% - 20%                 | 1.33E-10 |
| 40% - 10%                 | 0.596922 | 40% - 10%                 | 2.55E-15 |
| 40% - 5%                  | 0.189531 | 40% - 5%                  | 0        |
| 40% - PBS                 | 0.000713 | 40% - PBS                 | 0        |
| 40% - 30%                 | 0.077417 | 40% - 30%                 | 6.73E-05 |
| 20% - 10%                 | 0.000203 | 20% - 10%                 | 1.03E-05 |
| 20% - 5%                  | 4.16E-07 | 20% - 5%                  | 6.55E-08 |
| 20% - PBS                 | 9.99E-16 | 20% - PBS                 | 1.09E-11 |
| 20% - 30%                 | 2.27E-09 | 20% - 30%                 | 0.662963 |
| 10% - 5%                  | 0.0459   | 10% - 5%                  | 0.620671 |
| 10% - PBS                 | 7.25E-06 | 10% - PBS                 | 0.123495 |
| 10% - 30%                 | 0.00961  | 10% - 30%                 | 0.016926 |
| 5% - PBS                  | 0.035577 | 5% - PBS                  | 0.205516 |
| 5% - 30%                  | 0.711279 | 5% - 30%                  | 0.005608 |
| PBS - 30%                 | 0.045853 | PBS - 30%                 | 0.000821 |
| Concentration - GelMA     |          | Prewet vol - 40% PEG 1000 |          |
| PBS - 3%                  | 3.41E-07 | 15 ul - 20 ul             | 0.337104 |
| PBS - 5%                  | 5.77E-15 | 15 ul - 24 ul             | 2.29E-07 |
| 3% - 5%                   | 0.001877 | 20 ul - 24 ul             | 4.16E-09 |
| Prewet vol - 20% PEG 1000 |          | Prewet vol - 5% GelMA     |          |
| 15 ul - 20 ul             | 0.487121 | 15 ul - 20 ul             | 0.298923 |
| 15 ul - 24 ul             | 0.00716  | 15 ul - 24 ul             | 0.003603 |
| 20 ul - 24 ul             | 0.000183 | 20 ul - 24 ul             | 0.003314 |

|                          |          |                          |          |
|--------------------------|----------|--------------------------|----------|
| Vol Ratio - 20% PEG 1000 |          | Vol Ratio - 40% PEG 1000 |          |
| 1/6 - 1/4                | 1.81E-12 | 1/6 - 1/4                | 1.33E-07 |
| 1/6 - 1/3                | 0        | 1/6 - 1/3                | 1.11E-16 |
| 1/6 - 1/2                | 0        | 1/6 - 1/2                | 5.30E-09 |
| 1/6 - 3/4                | 0        | 1/6 - 3/4                | 0        |
| 1/4 - 1/3                | 5.78E-09 | 1/4 - 1/3                | 0.005279 |
| 1/4 - 1/2                | 0        | 1/4 - 1/2                | 0.054437 |
| 1/4 - 3/4                | 0        | 1/4 - 3/4                | 0        |
| 1/3 - 1/2                | 0        | 1/3 - 1/2                | 0.81882  |
| 1/3 - 3/4                | 0        | 1/3 - 3/4                | 0        |
| 1/2 - 3/4                | 0        | 1/2 - 3/4                | 0        |
| Width - 20% PEG 1000     |          | Width - 40% PEG 1000     |          |
| 1 mm - 1.5 mm            | 0.000201 | 1 mm - 1.5 mm            | 0.006541 |
| 1 mm - 2 mm              | 1.25E-06 | 1 mm - 2 mm              | 0.001128 |
| 1.5 mm - 2 mm            | 0.597803 | 1.5 mm - 2 mm            | 0.170409 |
| Profile Class 1          |          | Profile Class 2          |          |
| 20% P1000 - 10% P1000    | 0.000203 | 40% P1000 - 10% P4000    | 0.193579 |
| 20% P1000 - 5% P1000     | 4.16E-07 | 40% P1000 - 5% P4000     | 0.042254 |
| 20% P1000 - PBS          | 9.99E-16 | 40% P1000 - 30% P1000    | 0.07733  |
| 20% P1000 - 3% Gel       | 0.720241 | 40% P1000 - 5% Gel       | 6.41E-05 |
| 20% P1000 - 20% Hep      | 7.20E-12 | 10% P4000 - 5% P4000     | 0.622228 |
| 10% P1000 - 5% P1000     | 0.0459   | 10% P4000 - 30% P1000    | 0.884524 |
| 10% P1000 - PBS          | 7.25E-06 | 10% P4000 - 5% Gel       | 3.14E-06 |
| 10% P1000 - 3% Gel       | 0.028727 | 5% P4000 - 30% P1000     | 0.647624 |
| 10% P1000 - 20% Hep      | 2.50E-13 | 5% P4000 - 5% Gel        | 1.71E-08 |
| 5% P1000 - PBS           | 0.035577 | 30% P1000 - 5% Gel       | 1.35E-08 |
| 5% P1000 - 3% Gel        | 0.000474 | Profile Class 3          |          |
| 5% P1000 - 20% Hep       | 1.07E-14 | 40% P4000 - 40% P2000    | 1.24E-06 |
| PBS - 3% Gel             | 2.31E-07 | 40% P4000 - 30% P4000    | 6.83E-05 |
| PBS - 20% Hep            | 0        | 40% P4000 - 1% HAMA      | 0.2031   |
| 3% Gel - 20% Hep         | 1.15E-05 | 40% P2000 - 30% P4000    | 0.039313 |
| Polymer mix              |          | 40% P2000 - 1% HAMA      | 5.66E-05 |
| HA-Hep - Gel-HA          | 2.25E-05 | 30% P4000 - 1% HAMA      | 0.000313 |
| HA-Hep - Gel-Hep         | 1.10E-05 | Surface tension          |          |
| HA-Hep - PEG             | 0        | 0% - 0.1%                | 0.130366 |
| HA-Hep - PEG-Gel3        | 3.11E-11 | 0% - 1%                  | 0.164473 |
| Gel-HA - Gel-Hep         | 0.413298 | 0.1% - 1%                | 0.723969 |
| Gel-HA - PEG             | 0        |                          |          |
| Gel-HA - PEG-Gel3        | 0        |                          |          |
| Gel-Hep - PEG            | 0        |                          |          |
| Gel-Hep - PEG-Gel3       | 0        |                          |          |
| PEG - PEG-Gel3           | 1.23E-13 |                          |          |

**Table S4.** Significance testing for Figure 4c. Listed below are the p-values from balanced two-way ANOVA testing for each pair of data series in Figure 4c of the main text. Lines highlighted in gray indicate p-values **less** than 0.05.

| Case            | p-value  | Case                 | p-value  |
|-----------------|----------|----------------------|----------|
| PEG 1000        |          | other solutions      |          |
| 40p - 20p       | 0.055249 | DMEMwSER - DMEMnoSER | 0.142093 |
| 40p - 10p       | 7.73E-06 | DMEMwSER - 1pHAMA    | 0.91115  |
| 40p - 5p        | 0.000157 | DMEMwSER - 2pHepMA   | 0.777841 |
| 40p - PBS       | 0.083409 | DMEMwSER - PBS       | 0.338257 |
| 20p - 10p       | 0.000458 | DMEMnoSER - 1pHAMA   | 0.015074 |
| 20p - 5p        | 0.010375 | DMEMnoSER - 2pHepMA  | 0.048743 |
| 20p - PBS       | 0.815043 | DMEMnoSER - PBS      | 0.329304 |
| 10p - 5p        | 0.235076 | 1pHAMA - 2pHepMA     | 0.406792 |
| 10p - PBS       | 0.004977 | 1pHAMA - PBS         | 0.037019 |
| 5p - PBS        | 0.056885 | 2pHepMA - PBS        | 0.155059 |
| GelMA           |          |                      |          |
| 5p-Gel - 3p-Gel | 0.370203 |                      |          |
| 5p-Gel - PBS    | 0.830359 |                      |          |
| 3p-Gel - PBS    | 0.521487 |                      |          |

**Supplementary Videos S1, S2.** High-definition (HD) videos were captured of the gradient protocol with pre-wet solutions consisting of 20  $\mu$ l (S1) 5% and (S2) 40% PEGDM 1000. Droplets consisted of 10  $\mu$ l of the pre-wet solution plus Trypan blue dye. Due to its higher viscosity, the flow speed was noticeably less for the 40% PEGDM solution than for the 5% solution.

## References

- [1] Hancock MJ, He J, Mano JF, Khademhosseini A. Surface-tension-driven gradient generation in a fluid stripe for bench-top and microwell applications. *Small*. 2011;7:892-901.
- [2] Gonçalves CB, Trevisan N, Meirelles AJA. Kinematic viscosity of systems containing polyethylene glycol + salt + water at 298.2 k. *J Chem Eng Data*. 2004;50:177-81.
- [3] Gonzalez-Tello P, Camacho F, Blazquez G. Density and viscosity of concentrated aqueous solutions of polyethylene glycol. *J Chem Eng Data*. 1994;39:611-4.
- [4] Ninni L, Burd H, Fung WH, Meirelles AJA. Kinematic viscosities of poly(ethylene glycol) aqueous solutions. *J Chem Eng Data*. 2003;48:324-9.
- [5] Fouissac E, Milas M, Rinaudo M. Shear-rate, concentration, molecular weight, and temperature viscosity dependences of hyaluronate, a wormlike polyelectrolyte. *Macromolecules*. 1993;26:6945-51.
- [6] Kestin J, Khalifa HE, Correia RJ. Tables of the dynamic and kinematic viscosity of aqueous NaCl solutions in the temperature range 20–150 °C and the pressure range 0.1–35 MPa. *J Phys Chem Ref Data*. 1981;10:57–88.
- [7] Kirincic S, Klofutar C. Viscosity of aqueous solutions of poly(ethylene glycol)s at 298.15 K. *Fluid Phase Equilib*. 1999;155:311-25.
- [8] Mei L-H, Lin D-Q, Zhu Z-Q, Han Z-X. Densities and viscosities of polyethylene glycol + salt + water systems at 20 °C. *J Chem Eng Data*. 1995;40:1168-71.

- [9] Murugesan T, Perumalsamy M. Densities and viscosities of polyethylene glycol 2000 + salt + water systems from (298.15 to 318.15) K. *J Chem Eng Data*. 2005;50:1290-3.
- [10] Liberti PA, Stivala SS. Physicochemical studies of fractionated bovine heparin : II. Viscosity as a function of ionic strength. *Arch Biochem Biophys*. 1967;119:510-8.
- [11] Woernley DL, et al. The concentration dependence of sedimentation for gelatin. *Phys Med Biol*. 1958;2:346.
- [12] Miyawaki O, Norimatsu Y, Kumagai H, Irimoto Y, Kumagai H, Sakurai H. Effect of water potential on sol-gel transition and intermolecular interaction of gelatin near the transition temperature. *Biopolymers*. 2003;70:482-91.
- [13] Harkins WD, McLaughlin HM. The structure of films of water on salt solutions I. Surface tension and adsorption for aqueous solutions of sodium chloride. *J Am Chem Soc*. 1925;47:2083-9.
- [14] CRC handbook of chemistry and physics. Cleveland, Ohio: CRC Press; 2003.
- [15] Patist A, Bhagwat S, Penfield K, Aikens P, Shah D. On the measurement of critical micelle concentrations of pure and technical-grade nonionic surfactants. *J Surfactants Deterg*. 2000;3:53-8.
- [16] Couper A, Eley DD. Surface tension of polyoxyethylene glycol solutions. *J Polym Sci*. 1948;3:345-9.
